# Supplementary material for: Design and synthesis of core shells HZSM-5@MCM-41 with variable acidity and mesoporosity for lignin-catalyzed fast pyrolysis to prepare aromatics
Source: Royal Society of Chemistry journal article supplement (doi:10.1039/d4nj00530a), 2024-01-01
Supplement: d4nj00530a1.pdf [file d4nj00530a1.pdf]

Supplementary Material

## Design and synthesis of core shells HZSM-5@MCM-41 with variable acidity and mesoporosity for lignin-catalyzed fast pyrolysis to prepare aromatics

Yiwen Dai <sup>a</sup>, Xingxiang Wang <sup>a</sup>, Bin Dai <sup>a,\*</sup>, Jichang Liu <sup>a,b\*</sup>, Jiangbing Li <sup>a,\*</sup>,

<sup>a</sup> School of Chemistry and Chemical Engineering/State Key Laboratory Incubation Base for Green Processing of Chemical Engineering, Shihezi University, Shihezi 832003, China.

E-mail: db\_tea@shzu.edu.cn (Bin Dai), liujc@ecust.edu.cn (Jichang Liu), ljbing@126.com

(Jiangbing Li)<sup>1</sup>

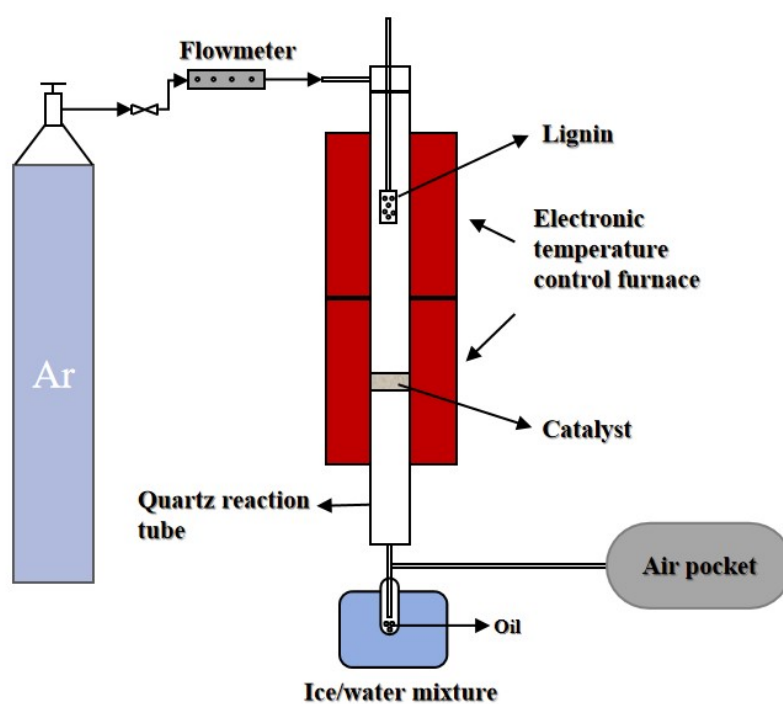

Fig. S1. Pyrolysis experimental setup

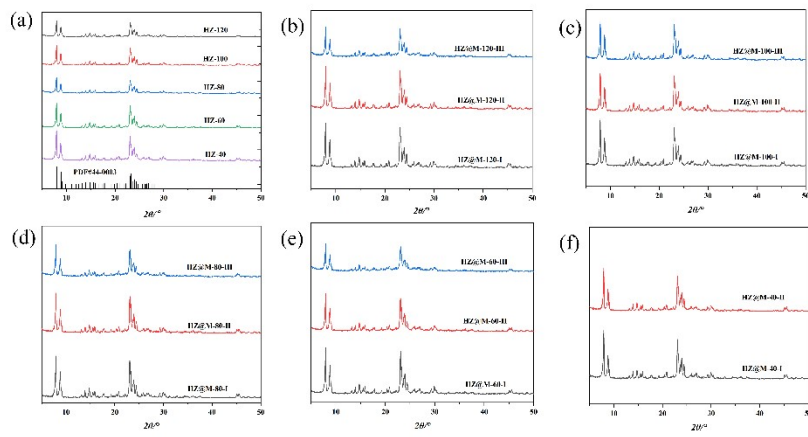

Fig. S2. a: XRD of pristine ZSM-5 with different Si/Al ratios; b-f: XRD of different core-shell catalysts.

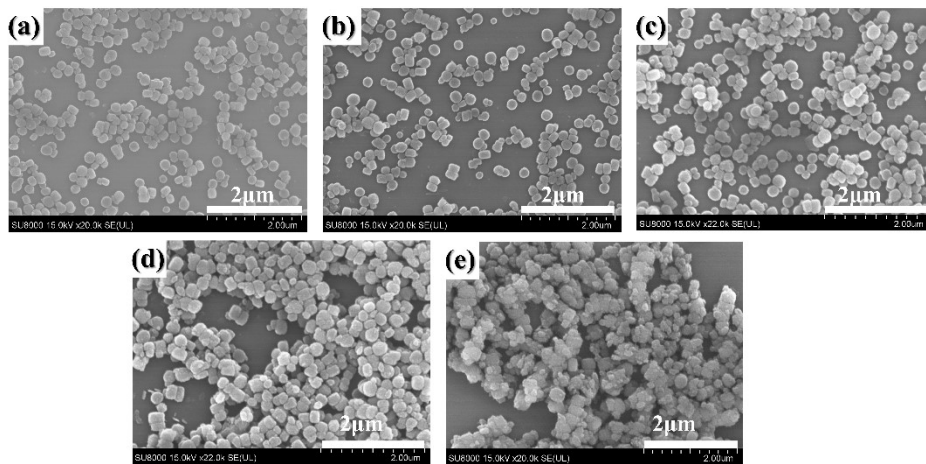

Fig. S3. SEM images of original ZSM-5 with different Si/Al ratios; a: Si/Al=120, b: Si/Al=100, c: Si/Al=80, d: Si/Al=60, e: Si/Al=40.

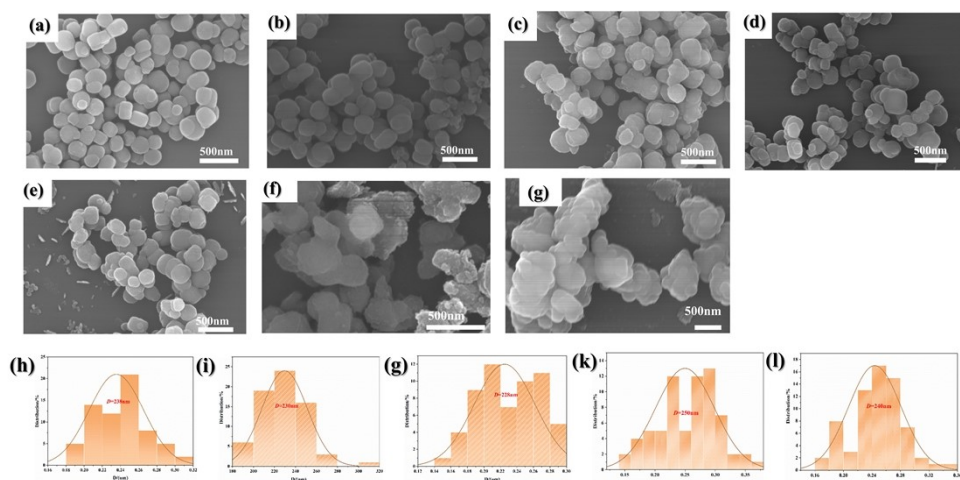

Fig. S4. SEM:(a)-(e): HZ@M-120-II、HZ@M-100-II、HZ@M-80-II、HZ@M-60-II、HZ@M-40-II, SEM: (f)Si/Al=60; (g): Si/Al=40. (h)-(l): Particle size distribution corresponding to (a)-(e).

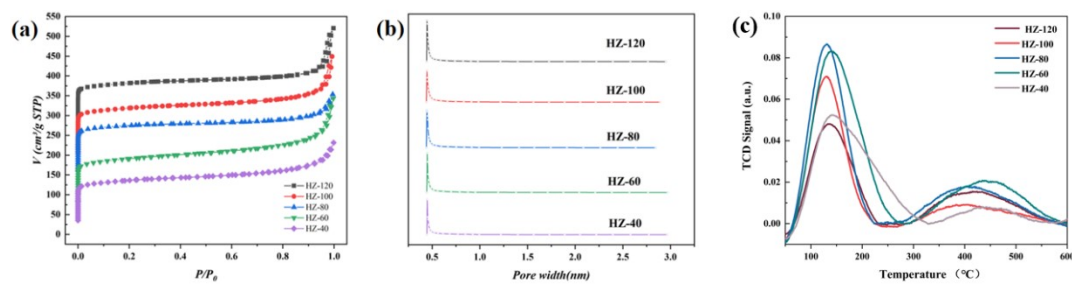

Fig. S5. (a): N<sub>2</sub> adsorption and desorption isotherms of pristine ZSM-5 with different Si/Al ratios, (b): Pore size distribution of pristine ZSM-5 with different Si/Al ratios, (c): NH<sub>3</sub>-TPD results for HZ-X catalysts

**Table S1**

Porosity characteristics of pristine ZSM-5 with different silica-to-aluminum ratios

| <b>Sam.</b>   | <b>S<sub>BET</sub>(m<sup>2</sup>g<sup>-1</sup>)</b> | <b>S<sub>micro</sub>(m<sup>2</sup>g<sup>-1</sup>)</b> | <b>S<sub>mes</sub>(m<sup>2</sup>g<sup>-1</sup>)</b> | <b>V<sub>t</sub>(cm<sup>3</sup>/g<sup>-1</sup>)</b> |
|---------------|-----------------------------------------------------|-------------------------------------------------------|-----------------------------------------------------|-----------------------------------------------------|
| <b>HZ-120</b> | 406.6                                               | 351.5                                                 | 55.1                                                | 0.37                                                |
| <b>HZ-100</b> | 418.3                                               | 349.7                                                 | 68.6                                                | 0.36                                                |
| <b>HZ-80</b>  | 406.4                                               | 358.1                                                 | 68.6                                                | 0.29                                                |
| <b>HZ-60</b>  | 410.4                                               | 310.1                                                 | 100.3                                               | 0.39                                                |
| <b>HZ-40</b>  | 369.7                                               | 294.4                                                 | 75.3                                                | 0.29                                                |

**Table S2**NH<sub>3</sub>-TPD acidity characteristics for different Si/Al ratios and the original ZSM-5

| <b>Sam.</b>   | <b>Weak acid</b> | <b>Strong acid</b> | <b>Total</b> |
|---------------|------------------|--------------------|--------------|
| <b>HZ-120</b> | 0.085            | 0.022              | 0.107        |
| <b>HZ-100</b> | 0.111            | 0.033              | 0.144        |
| <b>HZ-80</b>  | 0.138            | 0.059              | 0.197        |
| <b>HZ-60</b>  | 0.155            | 0.062              | 0.217        |
| <b>HZ-40</b>  | 0.137            | 0.016              | 0.153        |

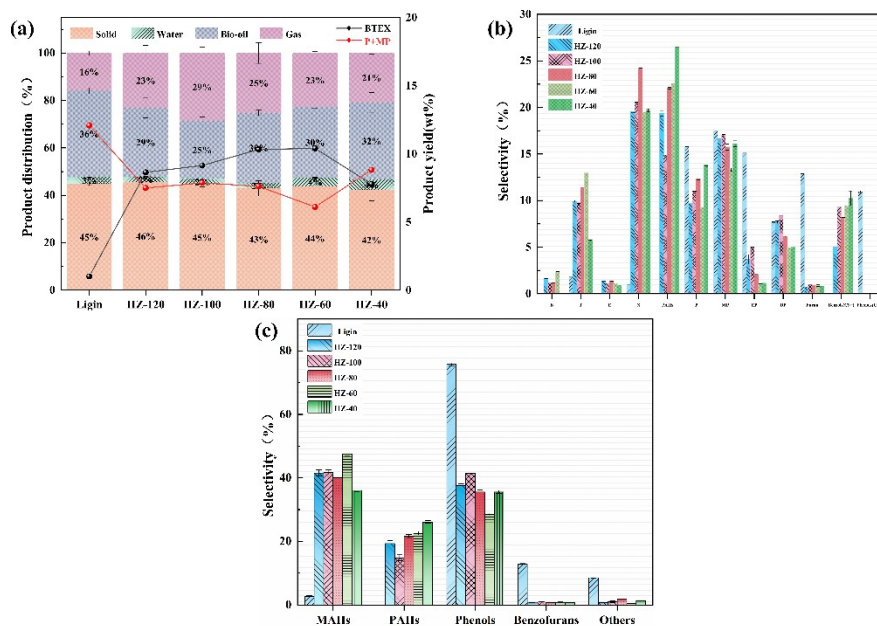

Fig. S6. a: three-phase product distributions of pure lignin, commercial ZSM-5, and pristine ZSM-5 with different Si/Al ratios, b-d: three-phase product distributions with different Si/Al ratios and different thicknesses of HZ@M-X-Y.

B: Benzene; T: Toluene; E: Ethylbenzene; X: Xylene; PAHs: polycyclic aromatic hydrocarbon; P: Phenol; MP: Methyl phenol; EP: Ethyl phenol; DP: Dimethylphenol.
